# Supplementary material
Source: PubMed Central journal article supplement (PMC7606745)
Supplement: NIHMS1609342-supplement-SuppInfo.pdf [file NIHMS1609342-supplement-SuppInfo.pdf]

**Supplementary Information for:** Inherited myeloproliferative neoplasm risk impacts hematopoietic stem cells

Erik L. Bao,<sup>1</sup> Satish K. Nandakumar,<sup>1</sup> Xiaotian Liao,<sup>1</sup> Alexander Bick, Juha Karjalainen, Marcin Tabaka, Olga I. Gan, Aki Havulinna, Tuomo Kiiskinen, Caleb A. Lareau, Aitzkoa Lopez de Lapuente Portilla, Bo Li, Connor Emdin, Veryan Codd, Christopher P. Nelson, Christopher J. Walker, Claire Churchhouse, Albert de la Chapelle, Daryl E. Klein, Björn Nilsson, Peter W.F. Wilson, Kelly Cho, Saiju Pyarajan, J. Michael Gaziano, Nilesh J. Samani, FinnGen, 23andMe Research Team, Million Veteran Program, Aviv Regev, Aarno Palotie, Benjamin M. Neale, John E. Dick, Pradeep Natarajan, Christopher J. O'Donnell, Mark J. Daly, Michael Milyavsky, Sekar Kathiresan, and Vijay G. Sankaran\*

<sup>1</sup>Equal contribution

**Contents**

Supplementary Figures

Supplementary Note

Supplementary References

## Supplementary Figures

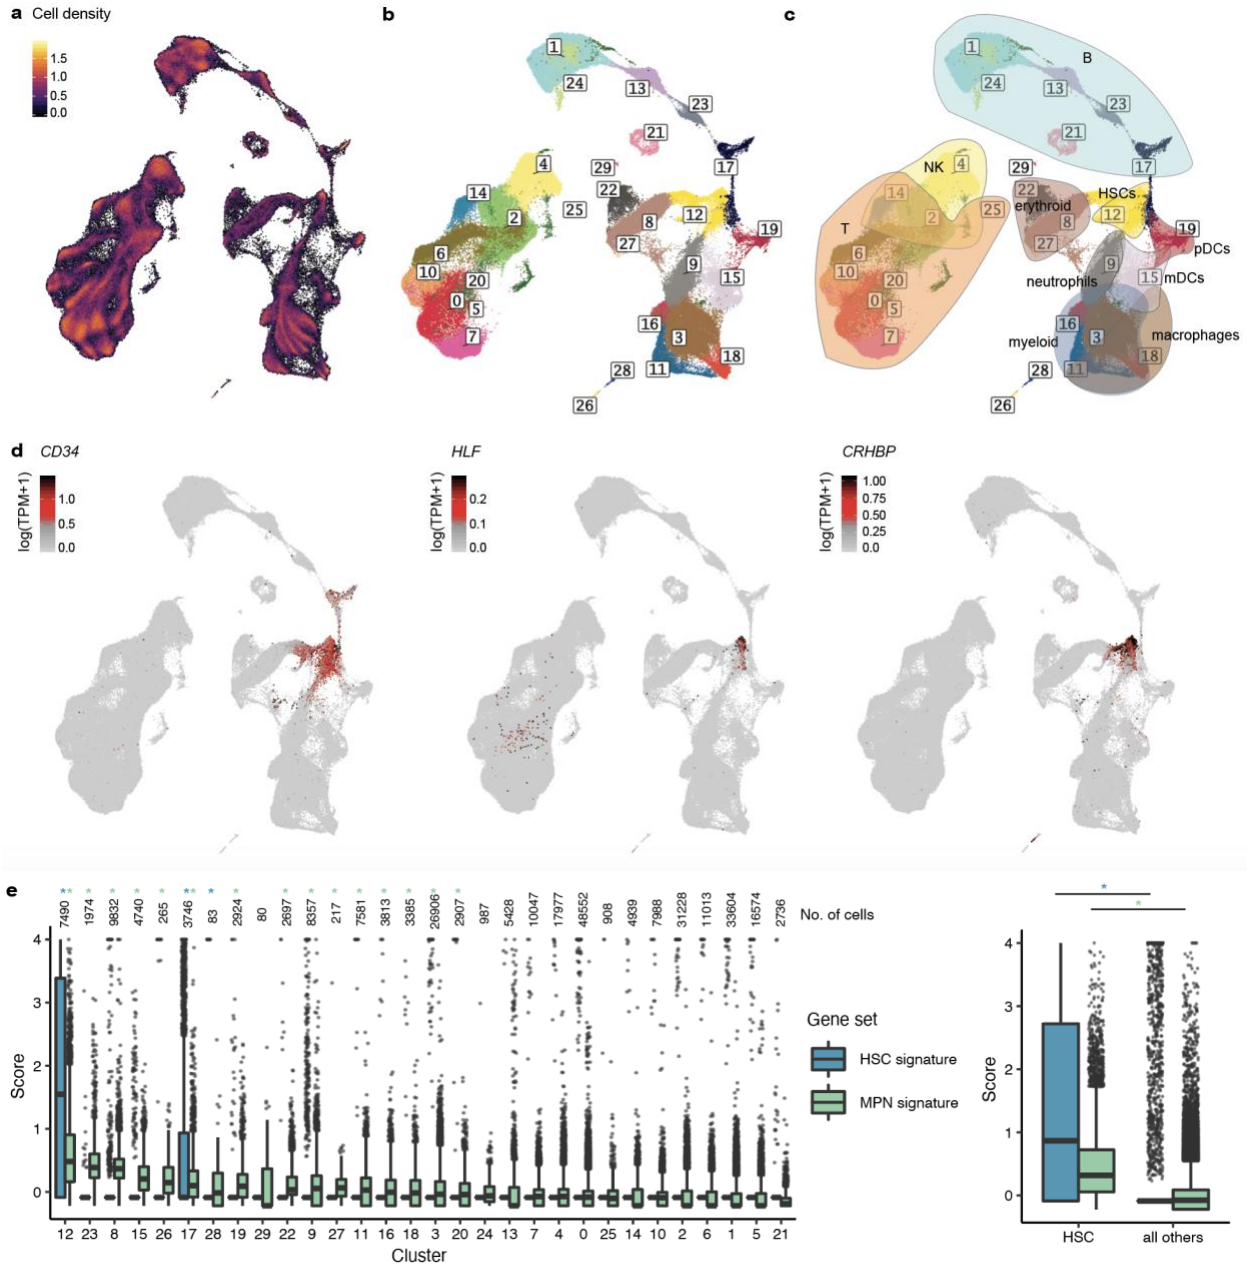

**Supplementary Figure 1.** Inference of cell types within 278,978 single cells from human bone marrow. **a-c**, UMAP projections of hematopoietic single cells, colored by **(a)** cell density, **(b)** Louvain community clusters, and **(c)** Louvain community clusters with overlays of annotated major hematopoietic lineages inferred from marker genes: B cells marked by *CD79A*, T cells marked by *CD3D*, natural killer (NK) cells marked by *GZMH* and *NKG7*, myeloid cells marked by *FCN1* and *MAFB*, macrophages marked by *CD68* and *CLEC10A*, myeloid dendritic cells (mDCs) marked by *FCER1A*, plasmacytoid dendritic cells (pDCs) marked by *IL3RA*, neutrophils marked by *ELANE*, and erythroid cells marked by *GYP A*. **d**, UMAP projections colored by the expression (log(transcripts

per million + 1)) of the three gene markers used to annotate HSCs (*CD34*, *HLF*, *CRHBP*). **e**, Left: The distribution of the HSC (blue) and MPN (green) gene scores across all Louvain clusters, ordered from left to right by decreasing average MPN signature score; Right: HSC and MPN gene scores in the combined HSC-significant clusters (12, 17, 28) vs. all other cells. False-discovery rate (FDR)-corrected  $*P < 0.001$  (one-tailed Mann-Whitney U-test), with the \* color coded corresponding to the gene signature.

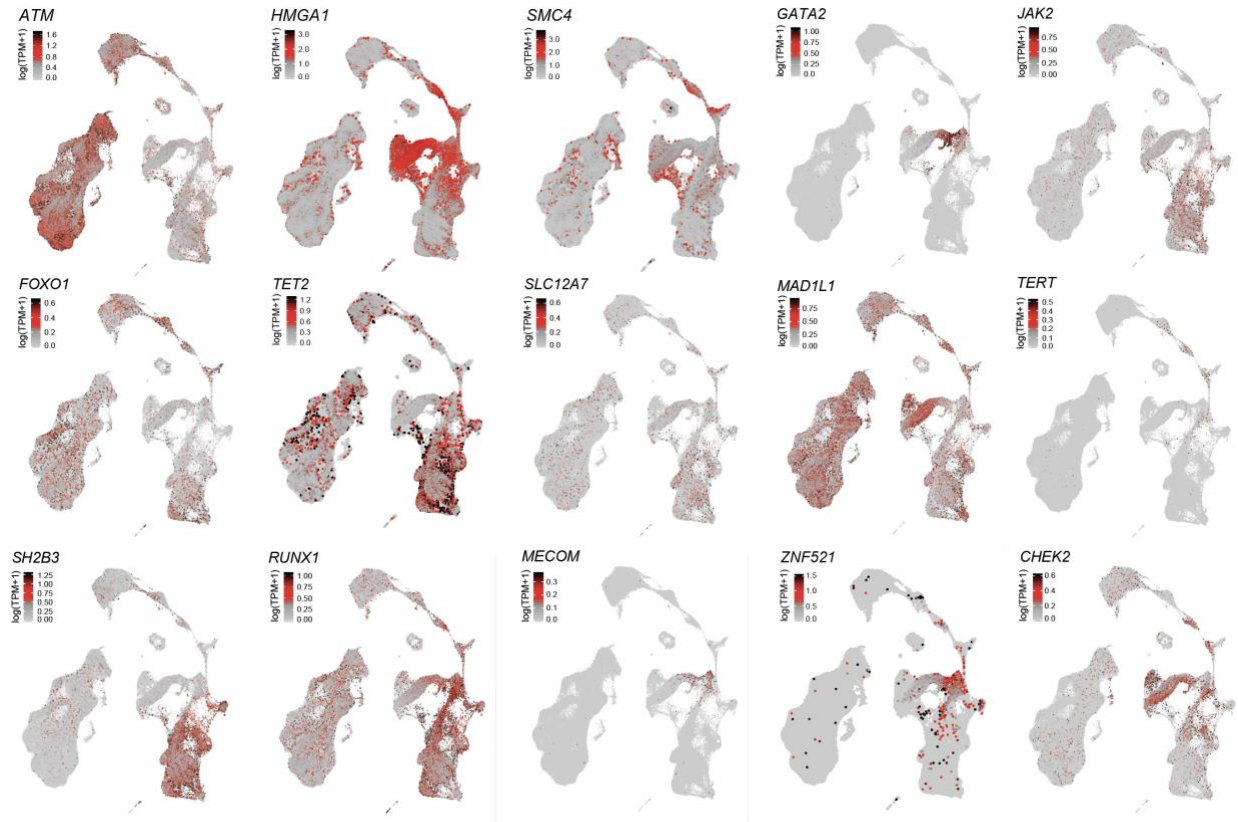

**Supplementary Figure 2.** UMAP projections of hematopoietic single cells (n = 278,978), colored by expression of 15 MPN target genes. Color bars represent log(transcripts per million + 1).

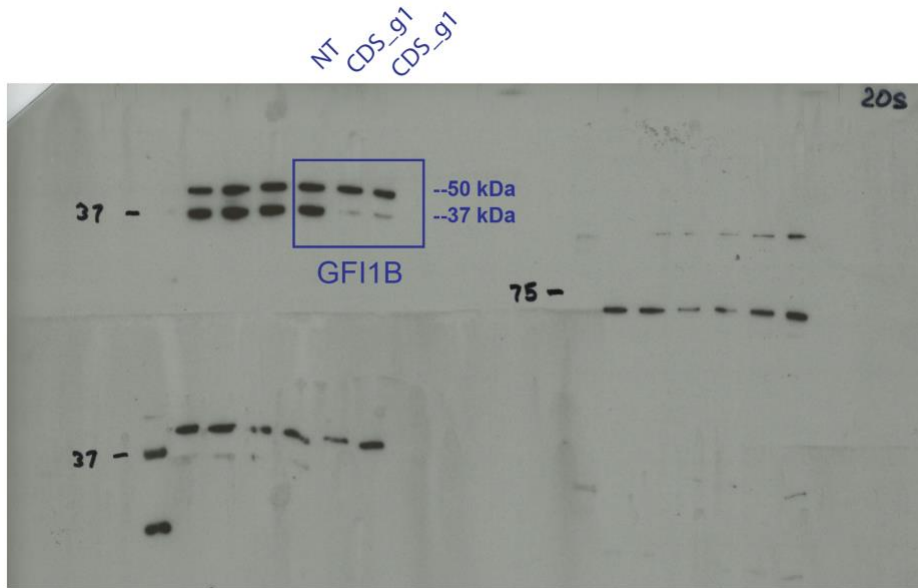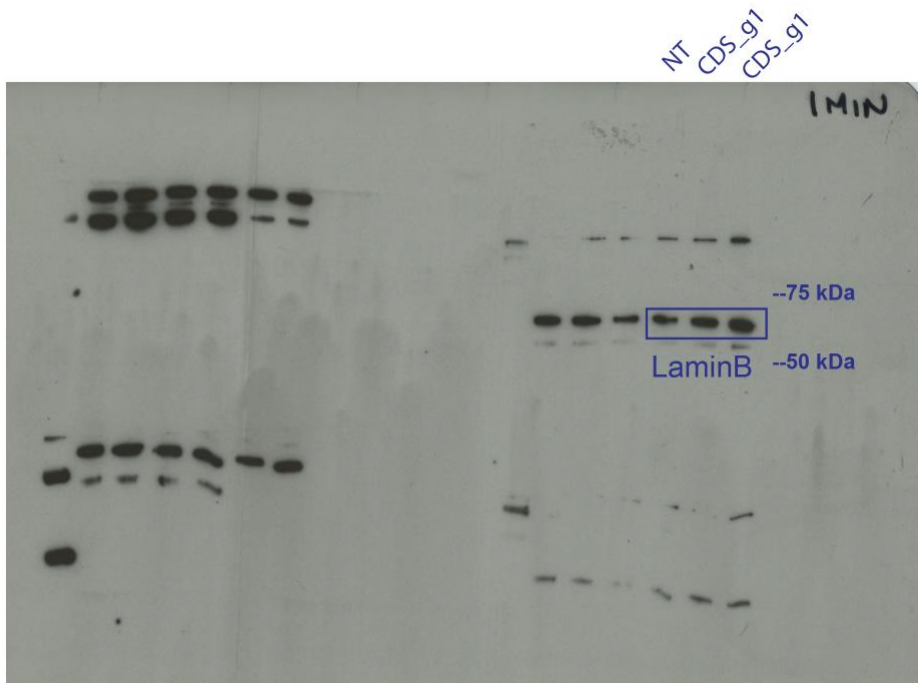

**Supplementary Figure 3.** Uncropped protein blots from **Extended Data Fig. 8e**. Western blot measuring GF11B protein expression 5 days following CRISPR/Cas9 targeting with non-targeting control (NT), or coding regions of GF11B (g1, g2). LaminB expression used as loading control. LaminB controls was probed on the same blot as the GF11B.

## Supplementary Note

### *Novel MPN risk loci*

In our study, we detected seven previously unreported loci associated with MPN risk at genome-wide significance ( $p < 5 \times 10^{-8}$ ). Here, we present each of these risk loci and nominate potential biological mechanisms based on bioinformatic functional analyses and literature mining.

The first novel association is in locus 3q21.3. The lead SNP rs9864772 (RAF = 0.608, p-value =  $2.06 \times 10^{-8}$ ) localizes to a distal enhancer for *GATA2*, which encodes a hematopoietic transcription factor that has been shown to play a causal role in inv(3)/t(3;3) AML<sup>1</sup>. Moreover, Gata2 has a critical role in HSC development, self-renewal, and maintenance in mice<sup>2,3</sup>, and human germline mutations in *GATA2* compromise HSC function and differentiation<sup>4</sup>.

There are two novel, conditionally independent associations in locus 3q25.33, represented by lead SNPs rs77249081 (RAF = 0.0096, p-value =  $5.54 \times 10^{-10}$ ) and rs74676712 (RAF = 0.114; p-value =  $3.64 \times 10^{-11}$ ), located ~650 kb apart. The nearest gene to rs74676712 is *KPNA4*. *KPNA4* encodes importin subunit alpha-4, which has been shown to mediate nuclear localization of STAT3, a downstream mediator of JAK2-mediated signaling<sup>5</sup>, as well as other nuclear factors. Importantly, JAK2 itself has been shown to have critical nuclear roles in hematopoietic cells<sup>6</sup>, suggesting a potential role for importins in this localization as well.

A fourth locus at 6p21.31, represented by lead SNP rs116466979 (RAF = 0.045; p-value =  $1.86 \times 10^{-12}$ ), is located near *HMGA1*. *HMGA1*, a non-histone chromatin remodeling oncogene, has been shown to be overexpressed in both murine models and patients with polycythemia vera, and higher levels associate disease progression to myelofibrosis and acute myeloid leukemia<sup>7,8</sup>. Interestingly, genetic mutations in the functionally related *HMGA2* gene have also been associated with patients with myeloid neoplasia<sup>9</sup> and hematopoietic stem cell expansion in MPNs<sup>10</sup>.

The fifth region, locus 13q14.11 is represented by the lead SNP rs8002412 (RAF = 0.18; joint p-value =  $5.23 \times 10^{-10}$ ) near the *FOXO1* gene. Previous work has shown that expression of *FOXO1* in human CD34+ cells promotes a preleukemic state with enhanced self-renewal and dysregulated differentiation<sup>11</sup>. Moreover, FoxO1 deletion, in tandem with other FoxO transcription factors, in mice compromises HSC survival<sup>12</sup>.

The sixth association is found in locus 18q11.2, represented by lead SNP rs9946154 (RAF = 0.644, p-value =  $1.50 \times 10^{-8}$ ) within an intron of *ZNF521*. Our gene mapping analysis nominated *ZNF521* as the most likely target gene in this locus through four distinct biological criteria (**Extended Data Fig. 7**). *ZNF521* is a transcription co-factor that is highly expressed in hematopoietic progenitors, and has been shown to regulate the proliferation and repopulation of hematopoietic progenitors<sup>13-15</sup>.

The seventh association is located in locus 21q22.12 within an intron of *RUNX1*. *RUNX1* encodes for runt-related transcription factor 1 and is required for HSC development, HSC homeostasis, lymphoid development, and platelet production. Somatic mutations and chromosomal rearrangements involving *RUNX1* are frequently observed in acute myeloid leukemia<sup>16</sup>, myelodysplastic syndrome (MDS)<sup>17</sup>, chronic myelomonocytic leukemia<sup>18</sup>, and MPNs<sup>19</sup>. Rare germline missense mutations in the gene have been linked to familial platelet disorders with increased risk of myeloid malignancy<sup>20</sup>.

## *Contributors of FinnGen*

### **Steering Committee**

Aarno Palotie Institute for Molecular Medicine Finland, HiLIFE, University of Helsinki, Finland  
Mark Daly Institute for Molecular Medicine Finland, HiLIFE, University of Helsinki, Finland

### **Pharmaceutical companies**

Howard Jacob Abbvie, Chicago, IL, United States  
Athena Matakidou Astra Zeneca, Cambridge, United Kingdom  
Heiko Runz Biogen, Cambridge, MA, United States  
Sally John Biogen, Cambridge, MA, United States  
Robert Plenge Celgene, Summit, NJ, United States  
Mark McCarthy Genentech, San Francisco, CA, United States  
Julie Hunkapiller Genentech, San Francisco, CA, United States  
Meg Ehm GlaxoSmithKline, Brentford, United Kingdom  
Dawn Waterworth GlaxoSmithKline, Brentford, United Kingdom  
Caroline Fox Merck, Kenilworth, NJ, United States  
Anders Malarstig Pfizer, New York, NY, United States  
Kathy Klinger Sanofi, Paris, France  
Kathy Call Sanofi, Paris, France

### **University of Helsinki & Biobanks**

Tomi Mäkelä HiLIFE, University of Helsinki, Finland, Finland  
Jaakko Kaprio Institute for Molecular Medicine Finland, HiLIFE, Helsinki, Finland, Finland  
Petri Virolainen Auria Biobank / University of Turku / Hospital District of Southwest Finland,  
Turku, Finland  
Kari Pulkki Auria Biobank / University of Turku / Hospital District of Southwest Finland,  
Turku, Finland  
Terhi Kilpi THL Biobank / The National Institute of Health and Welfare Helsinki, Finland  
Markus Perola THL Biobank / The National Institute of Health and Welfare Helsinki, Finland  
Jukka Partanen Finnish Red Cross Blood Service / Finnish Hematology Registry and  
Clinical Biobank, Helsinki, Finland  
Anne Pitkäranta Hospital District of Helsinki and Uusimaa, Helsinki, Finland  
Riitta Kaarteenaho Northern Finland Biobank Borealis / University of Oulu / Northern Ostrobothnia  
Hospital District, Oulu, Finland  
Seppo Vainio Northern Finland Biobank Borealis / University of Oulu / Northern Ostrobothnia  
Hospital District, Oulu, Finland  
Kimmo Savinainen Finnish Clinical Biobank Tampere / University of Tampere / Pirkanmaa Hospital  
District, Tampere, Finland



Veli-Matti Kosma            Biobank of Eastern Finland / University of Eastern Finland / Northern Savo Hospital District, Kuopio, Finland

Urho Kujala                Central Finland Biobank / University of Jyväskylä / Central Finland Health Care District, Jyväskylä, Finland

### **Other Experts/ Non-Voting Members**

Outi Tuovila                Business Finland, Helsinki, Finland

Minna Hendolin            Business Finland, Helsinki, Finland

Raimo Pakkanen            Business Finland, Helsinki, Finland

### **Scientific Committee**

#### **Pharmaceutical companies**

Jeff Waring                 Abbvie, Chicago, IL, United States

Bridget Riley-Gillis        Abbvie, Chicago, IL, United States

Athena Matakidou         Astra Zeneca, Cambridge, United Kingdom

Heiko Runz                 Biogen, Cambridge, MA, United States

Jimmy Liu                  Biogen, Cambridge, MA, United States

Shameek Biswas             Celgene, Summit, NJ, United States

Julie Hunkapiller         Genentech, San Francisco, CA, United States

Dawn Waterworth         GlaxoSmithKline, Brentford, United Kingdom

Meg Ehm                    GlaxoSmithKline, Brentford, United Kingdom

Dorothee Diogo             Merck, Kenilworth, NJ, United States

Caroline Fox                Merck, Kenilworth, NJ, United States

Anders Malarstig            Pfizer, New York, NY, United States

Catherine Marshall        Pfizer, New York, NY, United States

Xinli Hu                     Pfizer, New York, NY, United States

Kathy Call                  Sanofi, Paris, France

Kathy Klinger                Sanofi, Paris, France

Matthias Gossel             Sanofi, Paris, France

#### **University of Helsinki & Biobanks**

Samuli Ripatti              Institute for Molecular Medicine Finland, HiLIFE, Helsinki, Finland

Johanna Schleutker        Auria Biobank / University of Turku / Hospital District of Southwest Finland, Turku, Finland

Markus Perola              THL Biobank / The National Institute of Health and Welfare Helsinki, Finland

Mikko Arvas                Finnish Red Cross Blood Service / Finnish Hematology Registry and Clinical Biobank, Helsinki, Finland

Olli Carpén                 Hospital District of Helsinki and Uusimaa, Helsinki, Finland

Reetta Hinttala Northern Finland Biobank Borealis / University of Oulu / Northern Ostrobothnia Hospital District, Oulu, Finland

Johannes Kettunen Northern Finland Biobank Borealis / University of Oulu / Northern Ostrobothnia Hospital District, Oulu, Finland

Reijo Laaksonen Finnish Clinical Biobank Tampere / University of Tampere / Pirkanmaa Hospital District, Tampere, Finland

Arto Mannermaa Biobank of Eastern Finland / University of Eastern Finland / Northern Savo Hospital District, Kuopio, Finland

Urho Kujala Central Finland Biobank / University of Jyväskylä / Central Finland Health Care District, Jyväskylä, Finland

### **Other Experts/ Non-Voting Members**

Outi Tuovila Business Finland, Helsinki, Finland

Minna Hendolin Business Finland, Helsinki, Finland

Raimo Pakkanen Business Finland, Helsinki, Finland

### **Clinical Groups**

#### **Neurology Group**

Hilkka Soininen Northern Savo Hospital District, Kuopio, Finland

Valtteri Julkunen Northern Savo Hospital District, Kuopio, Finland

Anne Remes Northern Ostrobothnia Hospital District, Oulu, Finland

Reetta Kälviäinen Northern Savo Hospital District, Kuopio, Finland

Mikko Hiltunen Northern Savo Hospital District, Kuopio, Finland

Jukka Peltola Pirkanmaa Hospital District, Tampere, Finland

Pentti Tienari Hospital District of Helsinki and Uusimaa, Helsinki, Finland

Juha Rinne Hospital District of Southwest Finland, Turku, Finland

Adam Ziemann Abbvie, Chicago, IL, United States

Jeffrey Waring Abbvie, Chicago, IL, United States

Sahar Esmaeeli Abbvie, Chicago, IL, United States

Nizar Smaoui Abbvie, Chicago, IL, United States

Anne Lehtonen Abbvie, Chicago, IL, United States

Susan Eaton Biogen, Cambridge, MA, United States

Heiko Runz Biogen, Cambridge, MA, United States

Sanni Lahdenperä Biogen, Cambridge, MA, United States

Janet van Adelsberg Celgene, Summit, NJ, United States

Shameek Biswas Celgene, Summit, NJ, United States

John Michon Genentech, San Francisco, CA, United States

Geoff Kerchner Genentech, San Francisco, CA, United States

|                    |                                             |
|--------------------|---------------------------------------------|
| Julie Hunkapiller  | Genentech, San Francisco, CA, United States |
| Natalie Bowers     | Genentech, San Francisco, CA, United States |
| Edmond Teng        | Genentech, San Francisco, CA, United States |
| John Eicher        | Merck, Kenilworth, NJ, United States        |
| Vinay Mehta        | Merck, Kenilworth, NJ, United States        |
| Padhraig Gormley   | Merck, Kenilworth, NJ, United States        |
| Kari Linden        | Pfizer, New York, NY, United States         |
| Christopher Whelan | Pfizer, New York, NY, United States         |
| Fanli Xu           | GlaxoSmithKline, Brentford, United Kingdom  |
| David Pulford      | GlaxoSmithKline, Brentford, United Kingdom  |

**Gastroenterology Group**

|                    |                                                              |
|--------------------|--------------------------------------------------------------|
| Martti Färkkilä    | Hospital District of Helsinki and Uusimaa, Helsinki, Finland |
| Sampsa Pikkarainen | Hospital District of Helsinki and Uusimaa, Helsinki, Finland |
| Airi Jussila       | Pirkanmaa Hospital District, Tampere, Finland                |
| Timo Blomster      | Northern Ostrobothnia Hospital District, Oulu, Finland       |
| Mikko Kiviniemi    | Northern Savo Hospital District, Kuopio, Finland             |
| Markku Voutilainen | Hospital District of Southwest Finland, Turku, Finland       |
| Bob Georgantas     | Abbvie, Chicago, IL, United States                           |
| Graham Heap        | Abbvie, Chicago, IL, United States                           |
| Jeffrey Waring     | Abbvie, Chicago, IL, United States                           |
| Nizar Smaoui       | Abbvie, Chicago, IL, United States                           |
| Fedik Rahimov      | Abbvie, Chicago, IL, United States                           |
| Anne Lehtonen      | Abbvie, Chicago, IL, United States                           |
| Keith Usiskin      | Celgene, Summit, NJ, United States                           |
| Joseph Maranhville | Celgene, Summit, NJ, United States                           |
| Tim Lu             | Genentech, San Francisco, CA, United States                  |
| Natalie Bowers     | Genentech, San Francisco, CA, United States                  |
| Danny Oh           | Genentech, San Francisco, CA, United States                  |
| John Michon        | Genentech, San Francisco, CA, United States                  |
| Vinay Mehta        | Merck, Kenilworth, NJ, United States                         |
| Kirsi Kalpala      | Pfizer, New York, NY, United States                          |
| Melissa Miller     | Pfizer, New York, NY, United States                          |
| Xinli Hu           | Pfizer, New York, NY, United States                          |
| Linda McCarthy     | GlaxoSmithKline, Brentford, United Kingdom                   |

**Rheumatology Group**

|                |                                                              |
|----------------|--------------------------------------------------------------|
| Kari Eklund    | Hospital District of Helsinki and Uusimaa, Helsinki, Finland |
| Antti Palomäki | Hospital District of Southwest Finland, Turku, Finland       |

|                         |                                                                     |
|-------------------------|---------------------------------------------------------------------|
| Pia Isomäki             | Pirkanmaa Hospital District, Tampere, Finland                       |
| Laura Pirilä            | Hospital District of Southwest Finland, Turku, Finland              |
| Olli Kaipainen-Seppänen | Northern Savo Hospital District, Kuopio, Finland                    |
| Johanna Huhtakangas     | Northern Ostrobothnia Hospital District, Oulu, Finland              |
| Bob Georgantas          | Abbvie, Chicago, IL, United States                                  |
| Jeffrey Waring          | Abbvie, Chicago, IL, United States                                  |
| Fedik Rahimov           | Abbvie, Chicago, IL, United States                                  |
| Apinya Lertratanakul    | Abbvie, Chicago, IL, United States                                  |
| Nizar Smaoui            | Abbvie, Chicago, IL, United States                                  |
| Anne Lehtonen           | Abbvie, Chicago, IL, United States                                  |
| David Close             | Astra Zeneca, Cambridge, United Kingdom                             |
| Marla Hochfeld          | Celgene, Summit, NJ, United States                                  |
| Natalie Bowers          | Genentech, San Francisco, CA, United States                         |
| John Michon             | Genentech, San Francisco, CA, United States                         |
| Dorothee Diogo          | Merck, Kenilworth, NJ, United States                                |
| Vinay Mehta             | Merck, Kenilworth, NJ, United States                                |
| Kirsi Kalpala           | Pfizer, New York, NY, United States                                 |
| Nan Bing                | Pfizer, New York, NY, United States                                 |
| Xinli Hu                | Pfizer, New York, NY, United States                                 |
| Jorge Esparza Gordillo  | GlaxoSmithKline, Brentford, United Kingdom                          |
| Nina Mars               | Institute for Molecular Medicine Finland, HiLIFE, Helsinki, Finland |

### **Pulmonology Group**

|                    |                                                              |
|--------------------|--------------------------------------------------------------|
| Tarja Laitinen     | Pirkanmaa Hospital District, Tampere, Finland                |
| Margit Pelkonen    | Northern Savo Hospital District, Kuopio, Finland             |
| Paula Kauppi       | Hospital District of Helsinki and Uusimaa, Helsinki, Finland |
| Hannu Kankaanranta | Pirkanmaa Hospital District, Tampere, Finland                |
| Terttu Harju       | Northern Ostrobothnia Hospital District, Oulu, Finland       |
| Nizar Smaoui       | Abbvie, Chicago, IL, United States                           |
| David Close        | Astra Zeneca, Cambridge, United Kingdom                      |
| Steven Greenberg   | Celgene, Summit, NJ, United States                           |
| Hubert Chen        | Genentech, San Francisco, CA, United States                  |
| Natalie Bowers     | Genentech, San Francisco, CA, United States                  |
| John Michon        | Genentech, San Francisco, CA, United States                  |
| Vinay Mehta        | Merck, Kenilworth, NJ, United States                         |
| Jo Betts           | GlaxoSmithKline, Brentford, United Kingdom                   |
| Soumitra Ghosh     | GlaxoSmithKline, Brentford, United Kingdom                   |

### **Cardiometabolic Diseases Group**

|                       |                                                                |
|-----------------------|----------------------------------------------------------------|
| Veikko Salomaa        | The National Institute of Health and Welfare Helsinki, Finland |
| Teemu Niiranen        | The National Institute of Health and Welfare Helsinki, Finland |
| Markus Juonala        | Hospital District of Southwest Finland, Turku, Finland         |
| Kaj Metsärinne        | Hospital District of Southwest Finland, Turku, Finland         |
| Mika Kähönen          | Pirkanmaa Hospital District, Tampere, Finland                  |
| Juhani Junttila       | Northern Ostrobothnia Hospital District, Oulu, Finland         |
| Markku Laakso         | Northern Savo Hospital District, Kuopio, Finland               |
| Jussi Pihlajamäki     | Northern Savo Hospital District, Kuopio, Finland               |
| Juha Sinisalo         | Hospital District of Helsinki and Uusimaa, Helsinki, Finland   |
| Marja-Riitta Taskinen | Hospital District of Helsinki and Uusimaa, Helsinki, Finland   |
| Tiinamaija Tuomi      | Hospital District of Helsinki and Uusimaa, Helsinki, Finland   |
| Jari Laukkanen        | Central Finland Health Care District, Jyväskylä, Finland       |
| Ben Challis           | Astra Zeneca, Cambridge, United Kingdom                        |
| Andrew Peterson       | Genentech, San Francisco, CA, United States                    |
| Julie Hunkapiller     | Genentech, San Francisco, CA, United States                    |
| Natalie Bowers        | Genentech, San Francisco, CA, United States                    |
| John Michon           | Genentech, San Francisco, CA, United States                    |
| Dorothee Diogo        | Merck, Kenilworth, NJ, United States                           |
| Audrey Chu            | Merck, Kenilworth, NJ, United States                           |
| Vinay Mehta           | Merck, Kenilworth, NJ, United States                           |
| Jaakko Parkkinen      | Pfizer, New York, NY, United States                            |
| Melissa Miller        | Pfizer, New York, NY, United States                            |
| Anthony Muslin        | Sanofi, Paris, France                                          |
| Dawn Waterworth       | GlaxoSmithKline, Brentford, United Kingdom                     |
| <b>Oncology Group</b> |                                                                |
| Heikki Joensuu        | Hospital District of Helsinki and Uusimaa, Helsinki, Finland   |
| Tuomo Meretoja        | Hospital District of Helsinki and Uusimaa, Helsinki, Finland   |
| Olli Carpén           | Hospital District of Helsinki and Uusimaa, Helsinki, Finland   |
| Lauri Aaltonen        | Hospital District of Helsinki and Uusimaa, Helsinki, Finland   |
| Annika Auranen        | Pirkanmaa Hospital District , Tampere, Finland                 |
| Peeter Karihtala      | Northern Ostrobothnia Hospital District, Oulu, Finland         |
| Saila Kauppila        | Northern Ostrobothnia Hospital District, Oulu, Finland         |
| Päivi Auvinen         | Northern Savo Hospital District, Kuopio, Finland               |
| Klaus Elenius         | Hospital District of Southwest Finland, Turku, Finland         |
| Relja Popovic         | Abbvie, Chicago, IL, United States                             |
| Jeffrey Waring        | Abbvie, Chicago, IL, United States                             |
| Bridget Riley-Gillis  | Abbvie, Chicago, IL, United States                             |

|                            |                                                              |
|----------------------------|--------------------------------------------------------------|
| Anne Lehtonen              | Abbvie, Chicago, IL, United States                           |
| Athena Matakidou           | Astra Zeneca, Cambridge, United Kingdom                      |
| Jennifer Schutzman         | Genentech, San Francisco, CA, United States                  |
| Julie Hunkapiller          | Genentech, San Francisco, CA, United States                  |
| Natalie Bowers             | Genentech, San Francisco, CA, United States                  |
| John Michon                | Genentech, San Francisco, CA, United States                  |
| Vinay Mehta                | Merck, Kenilworth, NJ, United States                         |
| Andrey Loboda              | Merck, Kenilworth, NJ, United States                         |
| Aparna Chhibber            | Merck, Kenilworth, NJ, United States                         |
| Heli Lehtonen              | Pfizer, New York, NY, United States                          |
| Stefan McDonough           | Pfizer, New York, NY, United States                          |
| Marika Crohns              | Sanofi, Paris, France                                        |
| Diptee Kulkarni            | GlaxoSmithKline, Brentford, United Kingdom                   |
| <b>Ophthalmology Group</b> |                                                              |
| Kai Kaarniranta            | Northern Savo Hospital District, Kuopio, Finland             |
| Joni Turunen               | Hospital District of Helsinki and Uusimaa, Helsinki, Finland |
| Terhi Ollila               | Hospital District of Helsinki and Uusimaa, Helsinki, Finland |
| Sanna Seitsonen            | Hospital District of Helsinki and Uusimaa, Helsinki, Finland |
| Hannu Uusitalo             | Pirkanmaa Hospital District, Tampere, Finland                |
| Vesa Aaltonen              | Hospital District of Southwest Finland, Turku, Finland       |
| Hannele Uusitalo-Järvinen  | Pirkanmaa Hospital District, Tampere, Finland                |
| Marja Luodonpää            | Northern Ostrobothnia Hospital District, Oulu, Finland       |
| Nina Hautala               | Northern Ostrobothnia Hospital District, Oulu, Finland       |
| Heiko Runz                 | Biogen, Cambridge, MA, United States                         |
| Erich Strauss              | Genentech, San Francisco, CA, United States                  |
| Natalie Bowers             | Genentech, San Francisco, CA, United States                  |
| Hao Chen                   | Genentech, San Francisco, CA, United States                  |
| John Michon                | Genentech, San Francisco, CA, United States                  |
| Anna Podgornaia            | Merck, Kenilworth, NJ, United States                         |
| Vinay Mehta                | Merck, Kenilworth, NJ, United States                         |
| Dorothee Diogo             | Merck, Kenilworth, NJ, United States                         |
| Joshua Hoffman             | GlaxoSmithKline, Brentford, United Kingdom                   |
| <b>Dermatology Group</b>   |                                                              |
| Kaisa Tasanen              | Northern Ostrobothnia Hospital District, Oulu, Finland       |
| Laura Huilaja              | Northern Ostrobothnia Hospital District, Oulu, Finland       |
| Katariina Hannula-Jouppi   | Hospital District of Helsinki and Uusimaa, Helsinki, Finland |
| Tea Salmi                  | Pirkanmaa Hospital District, Tampere, Finland                |

|                 |                                                        |
|-----------------|--------------------------------------------------------|
| Sirkku Peltonen | Hospital District of Southwest Finland, Turku, Finland |
| Leena Koulu     | Hospital District of Southwest Finland, Turku, Finland |
| Ilkka Harvima   | Northern Savo Hospital District, Kuopio, Finland       |
| Kirsi Kalpala   | Pfizer, New York, NY, United States                    |
| Ying Wu         | Pfizer, New York, NY, United States                    |
| David Choy      | Genentech, San Francisco, CA, United States            |
| John Michon     | Genentech, San Francisco, CA, United States            |
| Nizar Smaoui    | Abbvie, Chicago, IL, United States                     |
| Fedik Rahimov   | Abbvie, Chicago, IL, United States                     |
| Anne Lehtonen   | Abbvie, Chicago, IL, United States                     |
| Dawn Waterworth | GlaxoSmithKline, Brentford, United Kingdom             |

**FinnGen Analysis working group**

|                      |                                             |
|----------------------|---------------------------------------------|
| Justin Wade Davis    | Abbvie, Chicago, IL, United States          |
| Bridget Riley-Gillis | Abbvie, Chicago, IL, United States          |
| Danjuma Quarless     | Abbvie, Chicago, IL, United States          |
| Slavé Petrovski      | Astra Zeneca, Cambridge, United Kingdom     |
| Jimmy Liu            | Biogen, Cambridge, MA, United States        |
| Chia-Yen Chen        | Biogen, Cambridge, MA, United States        |
| Paola Bronson        | Biogen, Cambridge, MA, United States        |
| Robert Yang          | Celgene, Summit, NJ, United States          |
| Joseph Maranville    | Celgene, Summit, NJ, United States          |
| Shameek Biswas       | Celgene, Summit, NJ, United States          |
| Diana Chang          | Genentech, San Francisco, CA, United States |
| Julie Hunkapiller    | Genentech, San Francisco, CA, United States |
| Tushar Bhangale      | Genentech, San Francisco, CA, United States |
| Natalie Bowers       | Genentech, San Francisco, CA, United States |
| Dorothee Diogo       | Merck, Kenilworth, NJ, United States        |
| Emily Holzinger      | Merck, Kenilworth, NJ, United States        |
| Padhraig Gormley     | Merck, Kenilworth, NJ, United States        |
| Xulong Wang          | Merck, Kenilworth, NJ, United States        |
| Xing Chen            | Pfizer, New York, NY, United States         |
| Åsa Hedman           | Pfizer, New York, NY, United States         |
| Kirsi Auro           | GlaxoSmithKline, Brentford, United Kingdom  |
| Clarence Wang        | Sanofi, Paris, France                       |
| Ethan Xu             | Sanofi, Paris, France                       |
| Franck Auge          | Sanofi, Paris, France                       |

|                             |                                                                                                                                   |
|-----------------------------|-----------------------------------------------------------------------------------------------------------------------------------|
| Clement Chatelain           | Sanofi, Paris, France                                                                                                             |
| Mitja Kurki                 | Institute for Molecular Medicine Finland, HiLIFE, University of Helsinki, Finland / Broad Institute, Cambridge, MA, United States |
| Samuli Ripatti              | Institute for Molecular Medicine Finland, HiLIFE, University of Helsinki, Finland                                                 |
| Mark Daly                   | Institute for Molecular Medicine Finland, HiLIFE, University of Helsinki, Finland                                                 |
| Juha Karjalainen            | Institute for Molecular Medicine Finland, HiLIFE, University of Helsinki, Finland / Broad Institute, Cambridge, MA, United States |
| Aki Havulinna               | Institute for Molecular Medicine Finland, HiLIFE, University of Helsinki, Finland                                                 |
| Anu Jalanko                 | Institute for Molecular Medicine Finland, HiLIFE, University of Helsinki, Finland                                                 |
| Kimmo Palin                 | University of Helsinki, Helsinki, Finland                                                                                         |
| Priit Palta                 | Institute for Molecular Medicine Finland, HiLIFE, University of Helsinki, Finland                                                 |
| Pietro della Briotta Parolo | Institute for Molecular Medicine Finland, HiLIFE, University of Helsinki, Finland                                                 |
| Wei Zhou                    | Broad Institute, Cambridge, MA, United States                                                                                     |
| Susanna Lemmelä             | Institute for Molecular Medicine Finland, HiLIFE, University of Helsinki, Finland                                                 |
| Manuel Rivas                | University of Stanford, Stanford, CA, United States                                                                               |
| Jarmo Harju                 | Institute for Molecular Medicine Finland, HiLIFE, University of Helsinki, Finland                                                 |
| Aarno Palotie               | Institute for Molecular Medicine Finland, HiLIFE, University of Helsinki, Finland                                                 |
| Arto Lehisto                | Institute for Molecular Medicine Finland, HiLIFE, University of Helsinki, Finland                                                 |
| Andrea Ganna                | Institute for Molecular Medicine Finland, HiLIFE, University of Helsinki, Finland                                                 |
| Vincent Llorens             | Institute for Molecular Medicine Finland, HiLIFE, University of Helsinki, Finland                                                 |
| Antti Karlsson              | Auria Biobank / University of Turku / Hospital District of Southwest Finland, Turku, Finland                                      |
| Kati Kristiansson           | THL Biobank / The National Institute of Health and Welfare Helsinki, Finland                                                      |
| Mikko Arvas                 | Finnish Red Cross Blood Service / Finnish Hematology Registry and Clinical Biobank, Helsinki, Finland                             |
| Kati Hyvärinen              | Finnish Red Cross Blood Service / Finnish Hematology Registry and Clinical Biobank, Helsinki, Finland                             |
| Jarmo Ritari                | Finnish Red Cross Blood Service / Finnish Hematology Registry and Clinical Biobank, Helsinki, Finland                             |
| Tiina Wahlfors              | Finnish Red Cross Blood Service / Finnish Hematology Registry and Clinical Biobank, Helsinki, Finland                             |
| Miika Koskinen              | Helsinki Biobank / Helsinki University and Hospital District of Helsinki and Uusimaa, Helsinki                                    |
| Olli Carpén                 | Helsinki Biobank / Helsinki University and Hospital District of Helsinki and Uusimaa, Helsinki                                    |



Johannes Kettunen Northern Finland Biobank Borealis / University of Oulu / Northern Ostrobothnia Hospital District, Oulu, Finland

Katri Pylkäs Northern Finland Biobank Borealis / University of Oulu / Northern Ostrobothnia Hospital District, Oulu, Finland

Marita Kalaoja Northern Finland Biobank Borealis / University of Oulu / Northern Ostrobothnia Hospital District, Oulu, Finland

Minna Karjalainen Northern Finland Biobank Borealis / University of Oulu / Northern Ostrobothnia Hospital District, Oulu, Finland

Tuomo Mantere Northern Finland Biobank Borealis / University of Oulu / Northern Ostrobothnia Hospital District, Oulu, Finland

Eeva Kangasniemi Finnish Clinical Biobank Tampere / University of Tampere / Pirkanmaa Hospital District, Tampere, Finland

Sami Heikkinen Biobank of Eastern Finland / University of Eastern Finland / Northern Savo Hospital District, Kuopio, Finland

Arto Mannermaa Biobank of Eastern Finland / University of Eastern Finland / Northern Savo Hospital District, Kuopio, Finland

Eija Laakkonen Central Finland Biobank / University of Jyväskylä / Central Finland Health Care District, Jyväskylä, Finland

Juha Kononen Central Finland Biobank / University of Jyväskylä / Central Finland Health Care District, Jyväskylä, Finland

### **Biobank directors**

Lila Kallio Auria Biobank / University of Turku / Hospital District of Southwest Finland, Turku, Finland

Sirpa Soini THL Biobank / The National Institute of Health and Welfare Helsinki, Finland

Jukka Partanen Finnish Red Cross Blood Service / Finnish Hematology Registry and Clinical Biobank, Helsinki, Finland

Kimmo Pitkänen Helsinki Biobank / Helsinki University and Hospital District of Helsinki and Uusimaa, Helsinki

Seppo Vainio Northern Finland Biobank Borealis / University of Oulu / Northern Ostrobothnia Hospital District, Oulu, Finland

Kimmo Savinainen Finnish Clinical Biobank Tampere / University of Tampere / Pirkanmaa Hospital District, Tampere, Finland

Veli-Matti Kosma Biobank of Eastern Finland / University of Eastern Finland / Northern Savo Hospital District, Kuopio, Finland

Teijo Kuopio Central Finland Biobank / University of Jyväskylä / Central Finland Health Care District, Jyväskylä, Finland

## **FinnGen Teams**

### **Administration**

Anu Jalanko Institute for Molecular Medicine Finland, HiLIFE, University of Helsinki, Finland  
Risto Kajanne Institute for Molecular Medicine Finland, HiLIFE, University of Helsinki, Finland  
Ulrike Lyhs Institute for Molecular Medicine Finland, HiLIFE, University of Helsinki, Finland

### **Analysis**

Mitja Kurki Institute for Molecular Medicine Finland, HiLIFE, University of Helsinki, Finland /  
Broad Institute, Cambridge, MA, United States  
Juha Karjalainen Institute for Molecular Medicine Finland, HiLIFE, University of Helsinki,  
Finland / Broad Institute, Cambridge, MA, United States  
Pietro della Briotta Parola Institute for Molecular Medicine Finland, HiLIFE, University of Helsinki,  
Finland  
Sina Rüeger Institute for Molecular Medicine Finland, HiLIFE, University of Helsinki, Finland  
Arto Lehistö Institute for Molecular Medicine Finland, HiLIFE, University of Helsinki, Finland  
Wei Zhou Broad Institute, Cambridge, MA, United States  
Masahiro Kanai Broad Institute, Cambridge, MA, United States

### **Clinical Endpoint Development**

Hannele Laivuori Institute for Molecular Medicine Finland, HiLIFE, University of Helsinki, Finland  
Aki Havulinna Institute for Molecular Medicine Finland, HiLIFE, University of Helsinki, Finland  
Susanna Lemmelä Institute for Molecular Medicine Finland, HiLIFE, University of Helsinki, Finland  
Tuomo Kiiskinen Institute for Molecular Medicine Finland, HiLIFE, University of Helsinki, Finland

### **Communication**

Mari Kaunisto Institute for Molecular Medicine Finland, HiLIFE, University of Helsinki, Finland

### **Data Management and IT Infrastructure**

Jarmo Harju Institute for Molecular Medicine Finland, HiLIFE, University of Helsinki, Finland  
Elina Kilpeläinen Institute for Molecular Medicine Finland, HiLIFE, University of Helsinki, Finland  
Timo P. Sipilä Institute for Molecular Medicine Finland, HiLIFE, University of Helsinki, Finland  
Georg Brein Institute for Molecular Medicine Finland, HiLIFE, University of Helsinki, Finland  
Oluwaseun A. Dada Institute for Molecular Medicine Finland, HiLIFE, University of Helsinki, Finland  
Ghazal Awaisa Institute for Molecular Medicine Finland, HiLIFE, University of Helsinki, Finland  
Anastasia Shcherban Institute for Molecular Medicine Finland, HiLIFE, University of Helsinki, Finland  
Tuomas Sipilä Institute for Molecular Medicine Finland, HiLIFE, University of Helsinki, Finland

### **Genotyping**

Kati Donner Institute for Molecular Medicine Finland, HiLIFE, University of Helsinki, Finland

### **Sample Collection Coordination**

Anu Loukola Helsinki Biobank / Helsinki University and Hospital District of Helsinki and Uusimaa, Helsinki

### **Sample Logistics**

Päivi Laiho THL Biobank / The National Institute of Health and Welfare Helsinki, Finland

Tuuli Sistonen THL Biobank / The National Institute of Health and Welfare Helsinki, Finland

Essi Kaiharju THL Biobank / The National Institute of Health and Welfare Helsinki, Finland

Markku Laukkanen THL Biobank / The National Institute of Health and Welfare Helsinki, Finland

Elina Järvensivu THL Biobank / The National Institute of Health and Welfare Helsinki, Finland

Sini Lähteenmäki THL Biobank / The National Institute of Health and Welfare Helsinki, Finland

Lotta Männikkö THL Biobank / The National Institute of Health and Welfare Helsinki, Finland

Regis Wong THL Biobank / The National Institute of Health and Welfare Helsinki, Finland

### **Registry Data Operations**

Hannele Mattsson THL Biobank / The National Institute of Health and Welfare Helsinki, Finland

Kati Kristiansson THL Biobank / The National Institute of Health and Welfare Helsinki, Finland

Susanna Lemmelä Institute for Molecular Medicine Finland, HiLIFE, University of Helsinki, Finland

Tero Hiekkalinna THL Biobank / The National Institute of Health and Welfare Helsinki, Finland

Manuel González Jiménez THL Biobank / The National Institute of Health and Welfare Helsinki, Finland

### **Sequencing Informatics**

Priit Palta Institute for Molecular Medicine Finland, HiLIFE, University of Helsinki, Finland

Kalle Pärn Institute for Molecular Medicine Finland, HiLIFE, University of Helsinki, Finland

Javier Nunez-Fontarnau Institute for Molecular Medicine Finland, HiLIFE, University of Helsinki, Finland

### **Trajectory Team**

Tarja Laitinen Pirkanmaa Hospital District, Tampere, Finland

Harri Siirtola University of Tampere, Tampere, Finland

Javier Gracia Tabuenca University of Tampere, Tampere, Finland

### *23andMe Contributors*

The following members of the 23andMe Research Team contributed to this study:

Michelle Agee

Babak Alipanahi

Adam Auton

Robert K. Bell

Katarzyna Bryc

Sarah L. Elson

Pierre Fontanillas

Nicholas A. Furlotte

David A. Hinds

Karen E. Huber

Aaron Kleinman

Nadia K. Litterman

Jennifer C. McCreight

Matthew H. McIntyre

Joanna L. Mountain

Elizabeth S. Noblin

Carrie A.M. Northover

Steven J. Pitts

J. Fah Sathirapongsasuti

Olga V. Sazonova

Janie F. Shelton

Suyash Shringarpure

Chao Tian

Joyce Y. Tung

Vladimir Vacic

Catherine H. Wilson

## *Million Veteran Program: Consortium Acknowledgement*

### **MVP Executive Committee**

- Co-Chair: J. Michael Gaziano, M.D., M.P.H.
- Co-Chair: Sumitra Muralidhar, Ph.D.
- Rachel Ramoni, D.M.D., Sc.D., Chief VA Research and Development Officer
- Jean Beckham, Ph.D.
- Kyong-Mi Chang, M.D.
- Christopher J. O'Donnell, M.D., M.P.H.
- Philip S. Tsao, Ph.D.
- James Breeling, M.D., Ex-Officio
- Grant Huang, Ph.D., Ex-Officio
- JP Casas Romero, M.D., Ph.D., Ex-Officio

### **MVP Program Office**

- Sumitra Muralidhar, Ph.D.
- Jennifer Moser, Ph.D.

### **MVP Recruitment/Enrollment**

- Recruitment/Enrollment Director/Deputy Director, Boston – Stacey B. Whitbourne, Ph.D.; Jessica V. Brewer, M.P.H.
- MVP Coordinating Centers
  - o Clinical Epidemiology Research Center (CERC), West Haven – Mihaela Aslan, Ph.D.
  - o Cooperative Studies Program Clinical Research Pharmacy Coordinating Center, Albuquerque – Todd Connor, Pharm.D.; Dean P. Argyres, B.S., M.S.
  - o Genomics Coordinating Center, Palo Alto – Philip S. Tsao, Ph.D.
  - o MVP Boston Coordinating Center, Boston - J. Michael Gaziano, M.D., M.P.H.
  - o MVP Information Center, Canandaigua – Brady Stephens, M.S.
- VA Central Biorepository, Boston – Mary T. Brophy M.D., M.P.H.; Donald E. Humphries, Ph.D. Luis E. Selva, Ph.D.
- MVP Informatics, Boston – Nhan Do, M.D.; Shahpoor Shayan
- MVP Data Operations/Analytics, Boston – Kelly Cho, Ph.D.

### **MVP Science**

- Science Operations – Christopher J. O'Donnell, M.D., M.P.H
- Genomics Core - Christopher J. O'Donnell, M.D., M.P.H.; Saiju Pyarajan Ph.D.; Philip S. Tsao, Ph.D.
- Phenomics Core- Kelly Cho, M.P.H, Ph.D.
- Data and Computational Sciences – Saiju Pyarajan, Ph.D.
- Statistical Genetics – Elizabeth Hauser, Ph.D.; Yan Sun, Ph.D.; Hongyu Zhao, Ph.D.

### **Current MVP Local Site Investigators**

- Atlanta VA Medical Center (Peter Wilson, M.D.)
- Bay Pines VA Healthcare System (Rachel McArdle, Ph.D.)
- Birmingham VA Medical Center (Louis Dellitalia, M.D.)
- Central Western Massachusetts Healthcare System (Kristin Mattocks, Ph.D., M.P.H.)
- Cincinnati VA Medical Center (John Harley, M.D., Ph.D.)
- Clement J. Zablocki VA Medical Center (Jeffrey Whittle, M.D., M.P.H.)
- VA Northeast Ohio Healthcare System (Frank Jacono, M.D.)
- Durham VA Medical Center (Jean Beckham, Ph.D.)
- Edith Nourse Rogers Memorial Veterans Hospital (John Wells., Ph.D.)
- Edward Hines, Jr. VA Medical Center (Salvador Gutierrez, M.D.)
- Veterans Health Care System of the Ozarks (Gretchen Gibson, D.D.S., M.P.H.)
- Fargo VA Health Care System (Kimberly Hammer, Ph.D.)
- VA Health Care Upstate New York (Laurence Kaminsky, Ph.D.)
- New Mexico VA Health Care System (Gerardo Villareal, M.D.)
- VA Boston Healthcare System (Scott Kinlay, M.B.B.S., Ph.D.)
- VA Western New York Healthcare System (Junzhe Xu, M.D.)
- Ralph H. Johnson VA Medical Center (Mark Hamner, M.D.)
- Columbia VA Health Care System (Roy Mathew, M.D.)
- VA North Texas Health Care System (Sujata Bhushan, M.D.)
- Hampton VA Medical Center (Pran Iruvanti, D.O., Ph.D.)
- Richmond VA Medical Center (Michael Godschalk, M.D.)
- Iowa City VA Health Care System (Zuhair Ballas, M.D.)
- Eastern Oklahoma VA Health Care System (Douglas Ivins, M.D.)
- James A. Haley Veterans' Hospital (Stephen Mastorides, M.D.)
- James H. Quillen VA Medical Center (Jonathan Moorman, M.D., Ph.D.)
- John D. Dingell VA Medical Center (Saib Gappy, M.D.)
- Louisville VA Medical Center (Jon Klein, M.D., Ph.D.)
- Manchester VA Medical Center (Nora Ratcliffe, M.D.)
- Miami VA Health Care System (Hermes Florez, M.D., Ph.D.)
- Michael E. DeBakey VA Medical Center (Olaoluwa Okusaga, M.D.)
- Minneapolis VA Health Care System (Maureen Murdoch, M.D., M.P.H.)
- N. FL/S. GA Veterans Health System (Peruvemba Sriram, M.D.)
- Northport VA Medical Center (Shing Shing Yeh, Ph.D., M.D.)
- Overton Brooks VA Medical Center (Neeraj Tandon, M.D.)
- Philadelphia VA Medical Center (Darshana Jhala, M.D.)
- Phoenix VA Health Care System (Samuel Aguayo, M.D.)

- Portland VA Medical Center (David Cohen, M.D.)
- Providence VA Medical Center (Satish Sharma, M.D.)
- Richard Roudebush VA Medical Center (Suthat Liangpunsakul, M.D., M.P.H.)
- Salem VA Medical Center (Kris Ann Oursler, M.D.)
- San Francisco VA Health Care System (Mary Whooley, M.D.)
- South Texas Veterans Health Care System (Sunil Ahuja, M.D.)
- Southeast Louisiana Veterans Health Care System (Joseph Constans, Ph.D.)
- Southern Arizona VA Health Care System (Paul Meyer, M.D., Ph.D.)
- Sioux Falls VA Health Care System (Jennifer Greco, M.D.)
- St. Louis VA Health Care System (Michael Rauchman, M.D.)
- Syracuse VA Medical Center (Richard Servatius, Ph.D.)
- VA Eastern Kansas Health Care System (Melinda Gaddy, Ph.D.)
- VA Greater Los Angeles Health Care System (Agnes Wallbom, M.D., M.S.)
- VA Long Beach Healthcare System (Timothy Morgan, M.D.)
- VA Maine Healthcare System (Todd Stapley, D.O.)
- VA New York Harbor Healthcare System (Scott Sherman, M.D., M.P.H.)
- VA Pacific Islands Health Care System (George Ross, M.D.)
- VA Palo Alto Health Care System (Philip Tsao, Ph.D.)
- VA Pittsburgh Health Care System (Patrick Strollo, Jr., M.D.)
- VA Puget Sound Health Care System (Edward Boyko, M.D.)
- VA Salt Lake City Health Care System (Laurence Meyer, M.D., Ph.D.)
- VA San Diego Healthcare System (Samir Gupta, M.D., M.S.C.S.)
- VA Sierra Nevada Health Care System (Mostaqul Huq, Pharm.D., Ph.D.)
- VA Southern Nevada Healthcare System (Joseph Fayad, M.D.)
- VA Tennessee Valley Healthcare System (Adriana Hung, M.D., M.P.H.)
- Washington DC VA Medical Center (Jack Lichy, M.D., Ph.D.)
- W.G. (Bill) Hefner VA Medical Center (Robin Hurley, M.D.)
- White River Junction VA Medical Center (Brooks Robey, M.D.)
- William S. Middleton Memorial Veterans Hospital (Robert Striker, M.D., Ph.D.)

## Supplementary References

- 1 Gröschel, S. *et al.* A Single Oncogenic Enhancer Rearrangement Causes Concomitant EVI1 and GATA2 Deregulation in Leukemia. *Cell* **157**, 369-381, doi:10.1016/j.cell.2014.02.019 (2014).
- 2 Rodrigues, N. P. *et al.* Haploinsufficiency of GATA2 perturbs adult hematopoietic stem-cell homeostasis. *Blood* **106**, 477, doi:10.1182/blood-2004-08-2989 (2005).
- 3 Tsai, F.-Y. *et al.* An early haematopoietic defect in mice lacking the transcription factor GATA-2. *Nature* **371**, 221-226, doi:10.1038/371221a0 (1994).
- 4 Collin, M., Dickinson, R. & Bigley, V. Haematopoietic and immune defects associated with GATA2 mutation. *British Journal of Haematology* **169**, 173-187, doi:10.1111/bjh.13317 (2015).
- 5 Liu, L., McBride, K. M. & Reich, N. C. STAT3 nuclear import is independent of tyrosine phosphorylation and mediated by importin- $\alpha$ 3. *Proceedings of the National Academy of Sciences of the United States of America* **102**, 8150 (2005).
- 6 Dawson, M. A. *et al.* JAK2 phosphorylates histone H3Y41 and excludes HP1 $\alpha$  from chromatin. *Nature* **461**, 819, doi:10.1038/nature08448  
<https://www.nature.com/articles/nature08448#supplementary-information> (2009).
- 7 Pierantoni, G. M. *et al.* High-mobility group A1 proteins are overexpressed in human leukaemias. *Biochemical Journal* **372**, 145 (2003).
- 8 Resar, L. *et al.* High Mobility Group A1/2 Chromatin Remodeling Proteins Associate with Polycythemia Vera Transformation to Acute Leukemia in Humans and a JAK2 V617F Transgenic Mouse Model. *Blood* **128**, 1958 (2016).
- 9 Odero, M. D. *et al.* Disruption and aberrant expression of HMGA2 as a consequence of diverse chromosomal translocations in myeloid malignancies. *Leukemia* **19**, 245, doi:10.1038/sj.leu.2403605 (2004).
- 10 Ikeda, K., Ogawa, K. & Takeishi, Y. THE ROLE OF HMGA2 IN THE PROLIFERATION AND EXPANSION OF A HEMATOPOIETIC CELL IN MYELOPROLIFERATIVE NEOPLASMS. *FUKUSHIMA JOURNAL OF MEDICAL SCIENCE* **58**, 91-100, doi:10.5387/fms.58.91 (2012).
- 11 Lin, S. *et al.* A FOXO1-induced oncogenic network defines the AML1-ETO preleukemic program. *Blood* **130**, 1213 (2017).
- 12 Tothova, Z. & Gilliland, D. G. FoxO Transcription Factors and Stem Cell Homeostasis: Insights from the Hematopoietic System. *Cell Stem Cell* **1**, 140-152, doi:<https://doi.org/10.1016/j.stem.2007.07.017> (2007).
- 13 Holmfeldt, P. *et al.* Functional screen identifies regulators of murine hematopoietic stem cell repopulation. *The Journal of Experimental Medicine* **213**, 433-449, doi:10.1084/jem.20150806 (2016).
- 14 Bond, H. M. *et al.* Early hematopoietic zinc finger protein—zinc finger protein 521: A candidate regulator of diverse immature cells. *The International Journal of Biochemistry & Cell Biology* **40**, 848-854, doi:<https://doi.org/10.1016/j.biocel.2007.04.006> (2008).
- 15 Garrison, B. S. *et al.* ZFP521 regulates murine hematopoietic stem cell function and facilitates MLL-AF9 leukemogenesis in mouse and human cells. *Blood* **130**, 619-624, doi:10.1182/blood-2016-09-738591 (2017).



- 16 Gaidzik, V. I. *et al.* RUNX1 mutations in acute myeloid leukemia are associated with distinct clinico-pathologic and genetic features. *Leukemia* **30**, 2160, doi:10.1038/leu.2016.126  
<https://www.nature.com/articles/leu2016126#supplementary-information> (2016).
- 17 Chen, C.-Y. *et al.* RUNX1 gene mutation in primary myelodysplastic syndrome – the mutation can be detected early at diagnosis or acquired during disease progression and is associated with poor outcome. *British Journal of Haematology* **139**, 405-414, doi:10.1111/j.1365-2141.2007.06811.x (2007).
- 18 Kuo, M. C. *et al.* RUNX1 mutations are frequent in chronic myelomonocytic leukemia and mutations at the C-terminal region might predict acute myeloid leukemia transformation. *Leukemia* **23**, 1426, doi:10.1038/leu.2009.48  
<https://www.nature.com/articles/leu200948#supplementary-information> (2009).
- 19 Grinfeld, J. *et al.* Classification and Personalized Prognosis in Myeloproliferative Neoplasms. *New England Journal of Medicine* **379**, 1416-1430, doi:10.1056/NEJMoa1716614 (2018).
- 20 Song, W.-J. *et al.* Haploinsufficiency of CBFA2 causes familial thrombocytopenia with propensity to develop acute myelogenous leukaemia. *Nature Genetics* **23**, 166, doi:10.1038/13793  
[https://www.nature.com/articles/ng1099\\_166#supplementary-information](https://www.nature.com/articles/ng1099_166#supplementary-information) (1999).
